# Supplementary material for: Comparative gene co-expression network analysis of epithelial to mesenchymal transition reveals lung cancer progression stages
Source: PubMed Central journal article supplement (PMC5719936; doi:10.1186/s12885-017-3832-1), 2017-12-06

# 254 EMT–dynamic genes

PC2

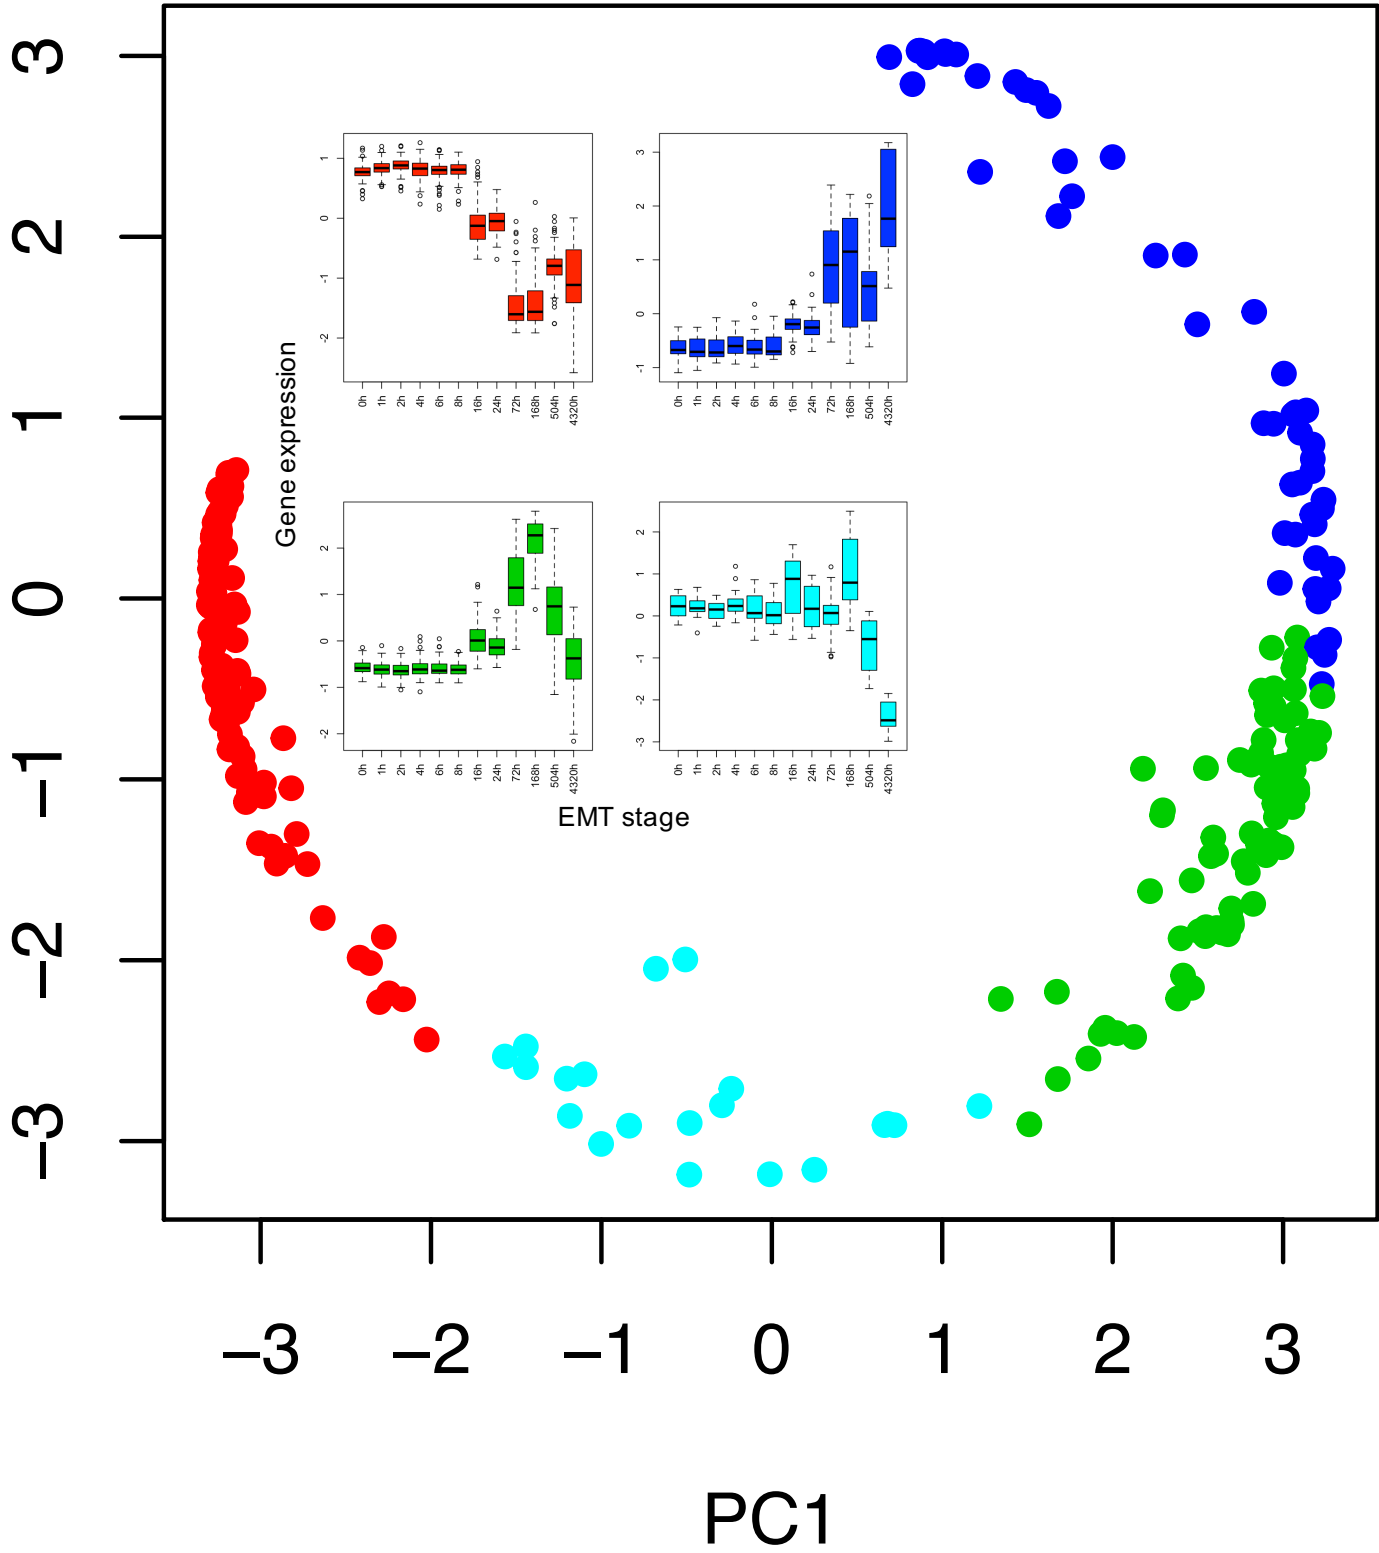

Supplement: 12885_2017_3832_MOESM2_ESM.pdf [file 12885_2017_3832_MOESM2_ESM.pdf]
