# Supplementary material for: Comparative gene co-expression network analysis of epithelial to mesenchymal transition reveals lung cancer progression stages
Source: Springer Nature journal article supplement (doi:10.1186/s12885-017-3832-1), 2017-12-01
Supplement: MOESM3 [file 15284148]

**A****Potential TFs regulating the modular genes**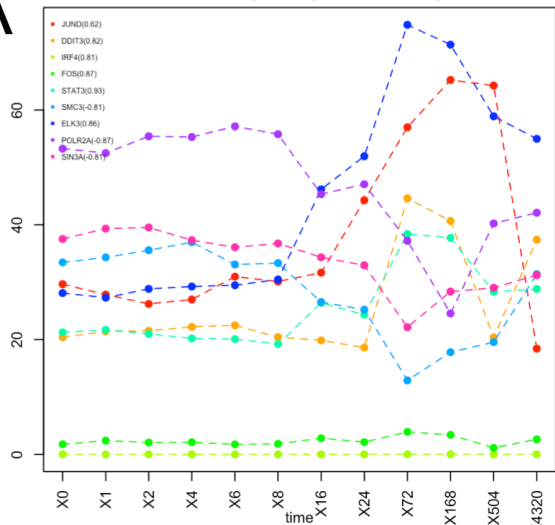

Eigengene of selected immunological module

**B**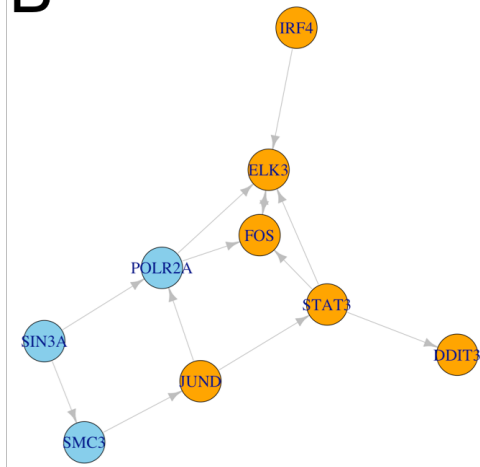

 Positively correlated TF  
 Negatively correlated TF
